1  
2  
3  
4  
5  
6  
7  
8  
9  
10  
11  
12  
13  
14  
15  
16  
17  
18  
19  
20  
21  
22  
23  
24  
25  
26  
27  
28  
29  
30  
31  
32  
33  
34  
35  
36  
37  
38  
39  
40  
41  
42  
43  
44

**Molecular reconstruction of recurrent evolutionary switching  
in olfactory receptor specificity**

Lucia L. Prieto-Godino<sup>1,2,\*</sup>, Hayden R. Schmidt<sup>1</sup> and Richard Benton<sup>1,\*</sup>

<sup>1</sup>Center for Integrative Genomics  
Faculty of Biology and Medicine  
Génopode Building  
University of Lausanne  
CH-1015  
Lausanne  
Switzerland

<sup>2</sup>The Francis Crick Institute  
London  
NW1 1BF  
United Kingdom

\*Corresponding authors:  
[lucia.prietogodino@crick.ac.uk](mailto:lucia.prietogodino@crick.ac.uk)  
[Richard.Benton@unil.ch](mailto:Richard.Benton@unil.ch)

45 **Abstract**

46

47 Olfactory receptor repertoires exhibit remarkable functional diversity, but how  
48 these proteins have evolved is poorly understood. Through analysis of extant and  
49 ancestrally-reconstructed drosophilid olfactory receptors from the Ionotropic  
50 Receptor (IR) family, we investigated evolution of two organic acid-sensing  
51 receptors, IR75a and IR75b. Despite their low amino acid identity, we identify a  
52 common “hotspot” in their ligand-binding pocket that has a major effect on  
53 changing the specificity of both IRs, as well as at least two distinct functional  
54 transitions in IR75a during evolution. Ligand-docking into IR models predicts that  
55 the hotspot does not contact odor molecules, suggesting that this residue  
56 indirectly influences ligand/receptor interactions. Moreover, we show that odor  
57 specificity is refined by changes in additional, receptor-specific sites, including  
58 those outside the ligand-binding pocket. Our work reveals how a core, common  
59 determinant of ligand-tuning acts within epistatic and allosteric networks of  
60 substitutions to lead to functional evolution of olfactory receptors.

61

62 **Introduction**

63

64 Amongst the senses, olfaction is particularly flexible over evolutionary time,  
65 enabling animals to adapt their recognition of the vast, ever-changing universe of  
66 volatile chemicals in the environment (Bargmann, 2006; Ramdya and Benton,  
67 2010). This flexibility is reflected in the evolution of large, divergent families of  
68 olfactory receptors with different odor tuning properties. Several functional  
69 surveys of receptor repertoires in vertebrates (e.g., humans and the house mouse  
70 *Mus musculus*) and insects (e.g., the vinegar fly *Drosophila melanogaster* and the  
71 malaria mosquito *Anopheles gambiae*) have identified ligands for many receptors  
72 (Carey et al., 2010; Hallem and Carlson, 2006; Saito et al., 2009). Moreover,  
73 comparative sequence and functional analyses of orthologous receptors across  
74 species have started to identify amino acid differences that can explain species-  
75 specific receptor tuning properties (Adipietro et al., 2012; Auer et al., 2020;  
76 Butterwick et al., 2018; Del Marmol et al., 2021; Leary et al., 2012; Mainland et  
77 al., 2013; Prieto-Godino et al., 2017; Yang et al., 2017). However, the molecular  
78 basis of functional changes in receptors over evolutionary timescales – and  
79 whether common principles in this process exist between different receptors –  
80 remains unclear.

81

82 A powerful model to study olfactory receptor evolution is the Ionotropic  
83 Receptor (IR) repertoire, a protostomian chemosensory subfamily of ionotropic  
84 glutamate receptors (iGluRs) (Benton et al., 2009; Croset et al., 2010; Ni, 2021;  
85 Rytz et al., 2013). Although IRs and iGluRs have limited amino acid sequence  
86 identity, their overall conserved (predicted) secondary and tertiary structural  
87 organization suggests that the chemosensory receptors share many mechanistic  
88 similarities with their iGluR ancestors (Abuin et al., 2011). The best-characterized  
89 IRs are predicted to be hetero-tetramers formed of two subunits of a conserved  
90 co-receptor and two subunits of a “tuning” receptor (Abuin et al., 2019, 2011). The  
91 latter are more variable in sequence both within and between species, particularly  
92 in the extracellular ligand-binding domain (LBD), consistent with their diverse  
odor-recognition properties.

93 Functional characterization of IRs in different drosophilid species has  
94 revealed orthologous receptors that have distinct odor recognition properties  
95 (Prieto-Godino et al., 2017, 2016), notably IR75a, a receptor that likely originated  
96 in the Neodipteran ancestor (>200 million years ago) and its paralog IR75b, which  
97 arose through duplication of *Ir75a* in the Drosophilidae ancestor (~60-70 million  
98 years ago) (Croset et al., 2010; Prieto-Godino et al., 2017). In *D. melanogaster*  
99 and *D. simulans*, two cosmopolitan species that feed on a wide range of  
100 fermented fruit, these receptors exhibit different sensitivity towards carboxylic  
101 acids: IR75a is tuned predominantly to acetic acid, while IR75b responds  
102 maximally to butyric acid (Prieto-Godino et al., 2017, 2016; Silbering et al., 2011).  
103 By contrast, in the closely-related island endemic *D. sechellia*, which feeds and  
104 breeds exclusively on the ripe noni fruit of the *Morinda citrifolia* shrub (Figure 1A),  
105 IR75a and IR75b preferentially respond to butyric acid and hexanoic acid,  
106 respectively (Prieto-Godino et al., 2017, 2016). These differences are likely to be  
107 ecologically significant: for example, acetic acid is a key product of microbial  
108 fermentation of vegetal material and regulates numerous behaviors in *D.*  
109 *melanogaster* including attraction (Becher et al., 2010) sexual receptivity (Gorter  
110 et al., 2016) and oviposition (Joseph et al., 2009; Kim et al., 2018). Hexanoic acid  
111 is a dominant component of noni fruit and elicits attractive behaviors in *D.*  
112 *sechellia* (Amlou et al., 1998; Dekker et al., 2006; Prieto-Godino et al., 2017). In  
113 this work, we combine comparative *in vivo* functional analyses of these receptors  
114 across the drosophilid phylogeny, with ancestral sequence reconstruction, site-  
115 directed mutagenesis and protein modelling to investigate their evolution.

116

## 117 Results

118

### 119 Evolution of olfactory responses of IR75a across the drosophilid phylogeny

120

121 The distinct responses of *D. sechellia* IR75a (*DseclR75a*) compared to orthologs  
122 in its two generalist cousins (Prieto-Godino et al., 2016) suggested that acetic  
123 acid-sensing was the ancestral function of IR75a. We tested this hypothesis by  
124 measuring odor-evoked responses of IR75a-expressing olfactory sensory  
125 neurons (OSNs) across the drosophilid phylogeny, representing >40 million years  
126 divergence time (Figure 1A-C, see Material and methods). As stimuli we used a  
127 panel of linear carboxylic acids spanning from one- to six-carbon chains  
128 (hereafter abbreviated to C1-C6, where acetic acid is C2 and butyric acid is C4).  
129 All tested species within the *melanogaster/obscura* group (except for *D. sechellia*)  
130 displayed strongest responses to C2, similar to *D. melanogaster* and *D. simulans*  
131 (Figure 1B-C). Unexpectedly, the responses of more divergent species were  
132 more similar to those of *D. sechellia*, exhibiting strongest responses to C4 (Figure  
133 1B-C).

134

135 To simplify data visualization and discern in an unbiased way which odors  
136 contribute maximally to differential tuning of *Ir75a* neurons across species, we  
137 performed principal component analysis (PCA) on their response profiles. The  
138 first principal component (PC1) explains 67.5% of the variance in the data, mostly  
139 capturing the inverse variation between C2 and C4 (Figure 1D). When plotting the  
140 C2 and C4 responses against each other, *Ir75a* neurons of different species  
segregated into two clusters with either high responses to C2 and low to C4 or

141 vice versa (Figure 1E). The clustering matched well the phylogeny with the  
142 exception of *D. sechellia*, which grouped together with *D. willistoni*, *D. mojavensis*  
143 and *D. virilis* (Figure 1A and 1E). These observations suggested a new model in  
144 which the ancestral drosophilid IR75a was predominantly a C4 sensor that  
145 evolved to become a C2 sensor in the last common ancestor of the melanogaster  
146 and obscura groups, before reverting to an ancestral-like state in *D. sechellia*  
147 (Figure 2A).

148

### 149 **Functional analysis of ancestrally-reconstructed IR75a**

150

151 To test this hypothesis, we “resurrected” the ancestral IR75a receptors at the  
152 ancestral drosophilid and *melanogaster/obscura* group phylogenetic nodes by  
153 inferring their sequence via maximum likelihood (Randall et al., 2016) from the  
154 sequence of orthologs from sixteen extant species (Figure 2A and Figure 2 –  
155 figure supplement 1 and Materials and methods). We synthesized genes  
156 encoding the inferred ancestral proteins – termed here IR75a<sup>Dros</sup> and IR75a<sup>mel-obs</sup>,  
157 respectively – and integrated these into a common genomic location to avoid  
158 differential positional influence on their expression. These transgenes were  
159 expressed individually in the *D. melanogaster* “IR decoder neuron”, an OSN that  
160 lack the endogenous tuning receptor subunit but expresses the IR8a co-receptor  
161 (Abuin et al., 2011; Grosjean et al., 2011; Prieto-Godino et al., 2016). When  
162 expressed in this system, the tuning curves of *D. melanogaster* IR75a  
163 (*DmeIR75a*) and *D. sechellia* IR75a (*DseclR75a*) recapitulate the response  
164 profile of these receptors expressed in their endogenous neurons, with strongest  
165 responses to C2 and C4, respectively (Figure 2B-C), consistent with previous  
166 observations (Prieto-Godino et al., 2016). As predicted, IR75a<sup>mel-obs</sup> responded  
167 similarly to *DmeIR75a* (Figure 2B-C). Importantly, the more ancient, resurrected  
168 receptor, IR75a<sup>Dros</sup>, had a tuning profile that was almost identical to *DseclR75a*,  
169 with maximal responses to C4 (Figure 2B-C). These results indicate that IR75a  
170 has switched tuning profile at least twice during its evolutionary history, from C4-  
171 to C2-sensing and, in *D. sechellia*, back again.

172

### 173 **Identifying the molecular basis of the functional evolution of IR75a**

174

175 To determine the molecular basis of the functional evolution of IR75a, we aligned  
176 the sequences of IR75a<sup>mel-obs</sup> and IR75a<sup>Dros</sup>. 114 positions in these proteins  
177 exhibit different amino acids (82% identity), of which 45 are located within the  
178 LBD (Figure 2 – figure supplement 1). As this level of divergence precluded  
179 straightforward experimental determination of the relevant sites, we first  
180 approached the problem by focusing on the more recent “reverse” transition of  
181 C2-sensing to C4-sensing that occurred on the branch leading to *DseclR75a*. We  
182 had previously narrowed down this tuning switch to three amino acid positions  
183 within the internal pocket of the bilobed (S1-S2) LBD (Prieto-Godino et al., 2016)  
184 (Figure 3A). Simultaneous substitution of these sites in *DmeIR75a* with the  
185 residues found in *DseclR75a* (i.e., T289S, Q536K and F538L) produced a  
186 receptor that faithfully recapitulated the response properties of *DseclR75a* when  
187 assessed in the IR decoder neuron (Figure 3B), as previously described (Prieto-  
188 Godino et al., 2016). Furthermore, reverse amino acid substitutions in *DseclR75a*



189 (S289T, K536Q and L538F) conferred response properties characteristic of  
190 *DmeIR75a* (Figure 3B). These results indicate that the change in tuning is  
191 encoded entirely within these three sites. Thus, there are only  $2^3 = 8$  variants to  
192 transit between *DmeIR75a* and *DseclR75a* (including the wild-type sequences) –  
193 compared to  $2^{114} = 2 \times 10^{34}$  possible variants between *IR75a*<sup>Dros</sup> and *IR75a*<sup>mel-obs</sup> –  
194 offering an excellent opportunity to study the functional evolution of an olfactory  
195 receptor.

196 We generated versions of *DmeIR75a* in which each of these three sites  
197 were substituted individually as well the three possible double substitutions. All  
198 single amino acid changes had an impact on receptor responses, shifting tuning  
199 towards C4 (and C3) to different extents, while still retaining some sensitivity to  
200 C2 (Figure 3C). Double substitutions showed further shifts towards the  
201 *DseclR75a* tuning profiles but to varying degrees: *DmeIR75a*<sup>T289S,Q536K</sup> is a  
202 broadly-tuned receptor that responds maximally (albeit weakly) to C2, C3 and C4,  
203 *DmeIR75a*<sup>Q536K,F538L</sup> displays maximum responses to both C3 and C4, and  
204 *DmeIR75a*<sup>T289S,F538L</sup> responds maximally to C4 alone (Figure 3C). To move  
205 beyond simple descriptions of the effects of these mutations, we used  
206 visualizations and analyses that give insights into the evolutionary landscape of  
207 this receptor, as described below.

208

## 209 Mapping the evolutionary landscape of IR75a

210

211 Evolutionary landscapes map genotypes onto a quantitative phenotype to  
212 illustrate evolutionary change as a “navigation” process. The roughness of the  
213 landscape determines how accessible each of all possible paths are, and  
214 therefore the likelihood that evolution proceeds through each path (Aguilar-  
215 Rodríguez et al., 2017; Wright, 1932). We reasoned this approach was useful to  
216 understand the evolution of *IR75a* as the lack of informative intraspecific genetic  
217 diversity within these receptor genes in drosophilid species (data not shown)  
218 precluded the direct identification of evolutionary intermediates.

219 Responses properties of a receptor are multidimensional, where each odor  
220 defines a dimension. However, PCA of the responses of all *DmeIR75a* receptor  
221 mutants to all odors revealed that PC1 explains most of the variance (54.5%) and  
222 captures the inverse variation between C2 and C4 – similar to the *IR75a* neuron  
223 response PCA across the drosophilid phylogeny (Figure 1D) – and, to a lesser  
224 extent, the co-variation of C5 with C4 (Figure 3D). We therefore plotted the  
225 phenotypic data for each single, double and triple *DmeIR75a* mutant in the C2  
226 versus C4 space alone (Figure 3E) and in the PC1 space (Figure 3F),  
227 acknowledging these simplifications represents only part of the functional  
228 changes (albeit potentially the most important).

229 The C2 vs C4 plot enables visualization of all possible evolutionary paths  
230 by joining the stepwise mutations from *DmeIR75a* to *DmeIR75a*<sup>T289S,Q536K,F538L</sup>.  
231 Most receptor variants are plotted close to the straight line (i.e., the shortest path)  
232 that joins the initial and final state, with the *DmeIR75a*<sup>F538L</sup> single mutant showing  
233 the largest individual “step” along this line (Figure 3E). If we assume that all steps  
234 along this line would be favoured by selection, this observation suggests the  
235 hypothesis that the F538L change might have been the first one of the three  
236 substitutions to occur, as *de novo* mutations with larger effect are typically

237 substituted first followed by those with smaller effect (Holder and Bull, 2001; Orr,  
238 2005). An alternative hypothesis is that T289S variant already existed, perhaps  
239 as standing variation in the population: T289S has little phenotypic consequence  
240 by itself (Figure 3C,E), but it greatly augments the effect of the F538L substitution  
241 (Figure 3C,E). In this case, T289S and F538L would have reached fixation  
242 together in the same genetic background because their combined effect allows  
243 for a large adaptive leap from one peak (C2) to the other (C4). The Q536K change  
244 alone has an intermediate phenotype, but we suspect is unlikely to have been the  
245 first to occur, as combination with either other amino acid change leads to a less  
246 specific receptor (*DmeIR75a*<sup>Q536K,F538L</sup>, lying to the top-right of the line), or a  
247 receptor with overall weak sensitivity (*DmeIR75a*<sup>T289S,Q536K</sup>, lying to the bottom-  
248 left of the line) (Figure 3C,E).

249 To formalize this analysis, we calculated epistasis (*i.e.*, non-additive effects  
250 of different mutations), which can constrain the available evolutionary paths  
251 (Aguilar-Rodríguez et al., 2017; Phillips, 2008). Using the projection of our  
252 physiological responses onto PC1 as our phenotypic readout, we calculated for  
253 each of the combinations of mutants (*i.e.*, single with single, or single with double)  
254 whether the sum of the effects of each of the starting substitutions on the wild-  
255 type background was significantly different from the effect of introducing both  
256 mutations simultaneously (see Materials and methods). Notably, negative  
257 magnitude epistasis was observed in all combinations of Q536K and F538L  
258 (whether T289S was also present the background or not) (Figure 3F, red lines).  
259 This observation supports our previous hypothesis that whether F538L or T289S  
260 was the first mutation to occur, the second one would be the other of these two,  
261 because Q536K incurs in negative epistasis when combined with F538L and it  
262 does not lead to a monotonic increase in responses when combined with T289S  
263 (Figure 3F). Furthermore, this visualization highlights the significant effect on  
264 tuning of the F538L substitution, as well as the minimal (statistically non-  
265 significant) effect of the T289S substitution, supporting its possible segregation in  
266 the population without deleterious effects. It remains unclear what, if any, is the  
267 function of Q536K; it is possible it was fixed by drift or affects some other aspect  
268 of receptor activity not analyzed here.

269

## 270 **A hotspot for evolution of IR odor tuning**

271

272 We next asked whether the knowledge of the molecular basis of the C2→C4  
273 tuning change on the *D. sechellia* branch offers insight into the ancestral switch  
274 from C4 to C2 in the last common ancestor of the *melanogaster/obscura* group.  
275 Strikingly, examination of the identity of residues aligned with *DmeIR75a* F538 in  
276 orthologs across the drosophilid phylogeny revealed a perfect correspondence  
277 between the identity of this position and the best agonist for the receptor: all  
278 IR75a orthologues of species responding most strongly to C2 have an F, while  
279 those that respond to C4, have an L (Figure 4A and Figure 2 – figure supplement  
280 1). Such correspondence was not seen for amino acid identities at position 289  
281 and 536: for example, *DwiIR75a* has a Q at the position equivalent to Q536 of  
282 *DmeIR75a* (Figure 2 – figure supplement 1), but this species' Ir75a neurons  
283 respond to C4, like *D. sechellia* (Figure 1C).

284 These observations suggest that position 538 (or equivalent in orthologous  
285 sequences of slightly different lengths) has been a “hotspot” for odor response  
286 evolution, changing from L to F in the *melanogaster/obscura* ancestor and then  
287 changing back on the *D. sechellia* branch. The reversion of amino acid identity in  
288 *DseclR75a* is not due to an inverse mutation in the corresponding DNA  
289 sequence: a C→T mutation in codon position one led to the L to F substitution in  
290 the *melanogaster/obscura* ancestor, while in *D. sechellia* a C→A mutation in  
291 codon position three led, convergently, to restoration of the L-encoding codon  
292 (Figure 4A).

293 The important contribution of a single amino acid in IR75a in determining  
294 the specificity for shorter- or longer-chain acids was reminiscent of our  
295 observation of the evolution of the paralogous receptor IR75b: the difference in  
296 tuning of *DmeIR75b* and *DseclR75b* to C4 and C6, respectively, is determined in  
297 large part by a T523S substitution in the LBD (Prieto-Godino et al., 2017). IR75b  
298 and IR75a exhibit only 38% amino acid identity. However, alignment of these  
299 receptors revealed that position 523 in *DmeIR75b* corresponds precisely to the  
300 538 hotspot in IR75a (Figure 4B). Thus, evolution of novel specificities in two  
301 different receptors – which diverged from a common ancestor >60 million years  
302 ago (Prieto-Godino et al., 2017) – is specified by changes in the same site within  
303 their LBDs.

304 To gain insights into the molecular mechanisms underlying the role of the  
305 hotspot in determining the functional properties of IR75a, we performed docking  
306 analysis of ligands in a protein homology model of the *DmeIR75a* LBD (Prieto-  
307 Godino et al., 2016). The top-ranked pose of C2 (or C4) in this model predicts an  
308 ionic bond of the carboxyl group of this acid with R297 (Figure 4C and Figure 4 –  
309 figure supplement 1). This arginine residue is conserved in all acid-sensing IRs  
310 (Benton et al., 2009), and is essential for odor-evoked activity of IR84a (Abuin et  
311 al., 2011); consistently, a similar interaction was predicted in a model of the IR84a  
312 LBD with its ligand phenylacetic acid (Figure 4 – figure supplement 1). Moreover,  
313 this interaction is equivalent to that of the  $\alpha$ -carboxyl group of the glutamate  
314 ligand with a conserved arginine in iGluRs (Figure 4C and figure 4 – figure  
315 supplement 1), suggesting a conserved mode of ligand-recognition in IRs and  
316 iGluRs. By contrast, the *DmeIR75a* hotspot residue F538 is not predicted to  
317 interact with ligand molecules, as it is >4 Å away from any of the top-ranked  
318 ligand poses (Figure 4C and figure 4 – figure supplement 1). These observations  
319 suggest that the hotspot is not directly involved ligand binding; how changes in  
320 the hotspot might alter odor response properties of IRs is considered in the  
321 Discussion.

322

### 323 **Functional interactions between the IR75b hotspot and surface residues of** 324 **the LBD**

325

326 Although mutation of the hotspot in *DmeIR75b* is sufficient to confer novel  
327 responses to C5 and C6, this single change did not fully recapitulate the response  
328 profile of *DseclR75b*, as *DmeIR75b*<sup>T523S</sup> retained sensitivity to shorter chain acids  
329 (Figure 5A). Compared to *DmeIR75b* and *D. simulans* IR75b (*DsimIR75b*),  
330 *DseclR75b* contain three additional changes within the LBD pocket region  
331 (P473S, G492S and A520T; like the hotspot, all are within the S2 lobe), but in our

332 previous work none of these appeared to contribute substantially – individually or  
333 together – to the refinement of specificity for C6 (Prieto-Godino et al., 2017). The  
334 *DsecIR75b* LBD contains six additional derived residues located in S1 (Prieto-  
335 Godino et al., 2017), leading us to test whether these sites contribute to the  
336 observed changes in odor responses.

337 Replacement of the entire S1 lobe in *DmeIR75b* with that of *DsecIR75b*  
338 generated a receptor, *DmeIR75b*<sup>DsecS1</sup>, with significantly increased responses to  
339 C6 and lower (albeit not statistically significant; Figure 5 source data 1) sensitivity  
340 to C3, when compared to *DmeIR75b* (Figure 5A). Addition of the hotspot  
341 substitution (T523S) produced a receptor (*DmeIR75b*<sup>DsecS1,T523S</sup>) that is more  
342 similar in response profile to *DsecIR75b* than either *DmeIR75b*<sup>DsecS1</sup> or  
343 *DmeIR75b*<sup>T523S</sup> (Figure 5A). However, this receptor still has robust sensitivity to  
344 C4, like *DmeIR75b* but unlike *DsecIR75b* (Figure 5A). Further incorporation of  
345 the three additional substitutions of residues in the S2 domain (Prieto-Godino et  
346 al., 2017), generated a receptor (*DmeIR75b*<sup>DsecS1,4mutS2</sup> that, in terms of  
347 specificity, is indistinguishable from *DsecIR75b* (Figure 5A). However, this  
348 receptor has overall reduced sensitivity for all acids when compared with  
349 *DsecIR75b*, and its response to C6 is significantly smaller than that of *DsecIR75b*  
350 (Figure 5A). Despite this overall reduced sensitivity, *DmeIR75b*<sup>DsecS1,4mutS2</sup> still  
351 has a significantly increased sensitivity to C6 when compared with *DmeIR75b*  
352 (Figure 5A).

353 To visualize how the S1 residues might impact receptor function, we  
354 mapped the position of the six derived changes within this lobe onto a protein  
355 homology model of *DmeIR75b* (Figure 5B). All of these are located on the  
356 surface of the LBD and therefore unlikely to contact ligands directly. IRs and  
357 iGluRs are thought to exhibit the same global structure and stoichiometry (Abuin  
358 et al., 2019, 2011), prompting us to align the modelled *DsecIR75b* LBD onto a  
359 homotetrameric iGluR structure (PDB 3KG2) (Figure 5C). This analysis did not  
360 suggest particularly close proximity of most of these residues to the interaction  
361 interface between subunits (Figure 5C).

362

## 363 Discussion

364

365 As species adapt to new ecological niches, olfactory receptors evolve to define  
366 new relationships between external signals and internal neural representations.  
367 Population genetic analyses of *D. melanogaster* strains isolated from diverse  
368 global habitats reveal that olfactory receptors (and other chemosensory protein  
369 families) display some of the strongest genomic signatures of recent selection  
370 (Arguello et al., 2016), suggesting these proteins act as “first responders” in local  
371 adaptation to new environments. In this work we have used comparative  
372 sequence and functional analyses across the well-defined phylogeny of the  
373 *Drosophila* genus to study how members of the organic-acid sensing clade of IRs  
374 have changed over evolutionary timescales.

375 Our most important finding is the discovery of a “hotspot” residue in these  
376 IRs, whose mutation had a major effect on the odor specificity of one receptor  
377 (IR75a) at two different timepoints during species diversification, as well as on the  
378 tuning change of a distinct receptor (IR75b). For IR75a, our data support a model  
379 in which the ancestral drosophilid IR75a was – contrary to previous assumptions



380 – a C4 sensor that switched, through mutation at the hotspot (and other sites), to  
381 C2 sensing in the *melanogaster/obscura* ancestor before “reverting” to C4-  
382 sensing in *D. sechellia*. The ancestral function of IR75b is still unclear: we have  
383 not been able to unambiguously identify Ir75b neurons across the drosophilid  
384 phylogeny, as they are not easily distinguishable from those expressing a related  
385 receptor, IR75c (Prieto-Godino et al., 2017). However, like IR75a, IR75b has  
386 adapted through hotspot substitution along the lineage leading to *D. sechellia*.  
387 Neither the identity nor even the chemical class of amino acids occupying the  
388 hotspot are conserved in these receptors (phenylalanine (F, aromatic) or leucine  
389 (L, hydrophobic) in IR75a; threonine (T) or serine (S) (both polar) in IR75b).  
390 These observations indicate that the position of the hotspot in these IRs’ LBDs,  
391 and not its identity *per se*, must explain its central role in defining odor-response  
392 properties in different receptors. Studies of other families of olfactory receptors in  
393 invertebrates and vertebrates have revealed enormous inter- and intra-specific  
394 sequence variation, some of which have been linked to differences in odor tuning  
395 (Adipietro et al., 2012; Auer et al., 2020; Block, 2018; Butterwick et al., 2018; Del  
396 Marmol et al., 2021; Leary et al., 2012; Mainland et al., 2013; Prieto-Godino et al.,  
397 2017; Yang et al., 2017). Within this molecular and function diversity, it will be of  
398 interest to examine whether analogous hotspots exist, revealing favored (or  
399 constrained) mechanisms through which evolution selects for new odor-detection  
400 properties.

401 The mechanistic role of the hotspot remains unknown. Our ligand docking  
402 into an IR75a LBD model suggest this residue does not contact ligands directly,  
403 located at a distance of >4 Å away. While we acknowledge the caveats of  
404 interpreting ligand-docking into protein models, our predictions are consistent with  
405 experimentally-determined glutamate/iGluRs interactions, as well as our previous  
406 structure-function analysis of IR84a (Abuin et al., 2011). IR75a orthologs across  
407 the drosophilid phylogeny conserve all three main agonist-binding residues  
408 characteristic of iGluRs (R297, T456, E507 in *DmelIR75a*) (Benton et al., 2009;  
409 Mayer, 2006), suggesting that the core contacts between odors and this receptor  
410 are unchanged, and that their mutation might be more likely to lead to a non-  
411 functional protein. By contrast, mutation of more distant residues that could, for  
412 example, (de)stabilize ligand-induced LBD conformational changes to alter the  
413 coupling between ligand binding and channel gating, may be a more subtle way  
414 of modifying the tuning profile of these receptors, without the risk of drastic loss of  
415 function. Future determination of the mechanistic impact of hotspot mutations will  
416 be an important priority, which will likely require experimentally-determined  
417 structures of odor-free and odor-bound IR LBDs. Such knowledge may also  
418 inform our understanding of the mechanism of ligand-induced gating in iGluRs,  
419 where the equivalent position (Y732 (Figure 5C)) is thought to have a function in  
420 ligand-gating although its precise role is unclear (Armstrong and Gouaux, 2000;  
421 Mamonova et al., 2008).

422 While the hotspot is clearly important, its contribution to modification of  
423 tuning properties is shaped by additional changes in these receptors. For IR75a,  
424 there are two additional substitutions within the ligand-binding pocket, while for  
425 IR75b, one or more residues located on the external surface of the LBD are  
426 relevant. In both cases, the functional consequences of combining these  
427 substitutions with that of the hotspot are not easily predicted from their individual



428 impact, revealing complex epistatic interactions. Moreover, the distance of these  
429 additional sites from the predicted odor-binding site, suggest the existence of  
430 allosteric effects of certain sites on odor/receptor interactions. These results are  
431 of interest in light of molecular evolutionary analyses of olfactory receptor  
432 repertoires, which have identified numerous residues under positive selection (or  
433 relaxed purifying selection) in different receptors – implying a contribution to  
434 functional divergence – in regions far from the predicted ligand-binding pocket  
435 (Arguello et al., 2016; Chen et al., 2010; Gardiner et al., 2009; Smadja et al.,  
436 2009; Steiger et al., 2010). Together such observations argue that the evolution  
437 of olfactory receptor specificity does not simply arise by alterations in direct  
438 interactions of receptors with odor ligands, but rather can emerge from a complex  
439 network of interactions of amino acid substitutions – with major or minor effects –  
440 both near and far from the ligand-binding pocket.

441 One clear limitation of our study is the restriction of our profiling to a set of  
442 linear carboxylic acids at a single concentration. While these ligands are found in  
443 nature and are the best agonists for these receptors among many screened odors  
444 (Silbering et al., 2011), they necessarily only give a partial insight into the  
445 functional changes of individual receptors. The C4 to C6 switch of IR75b in *D.*  
446 *sechellia* is likely related to high abundance of C6 in its sole host fruit (noni). For  
447 IR75a the ecological framework is less clear: we speculate that the C4 to C2  
448 switch in the *melanogaster/obscura* ancestor may be related to the use of host  
449 fruits with acetic-acid producing bacteria, which may then have been no longer  
450 relevant for *D. sechellia* which preferentially feeds upon ripe (non-fermenting)  
451 noni fruit (which contains much more C4 than C2 (Auer et al., 2020; Farine et al.,  
452 1996)). Future expansion of the odor profiling of these species' receptors will be  
453 essential to understand the pressures in the natural world that have selected for  
454 olfactory receptor proteins with new chemical recognition properties. Such  
455 knowledge, together with mechanistic insight into ligand/receptor interactions,  
456 may be useful to re-engineer the ligand-binding specificities of receptors (for  
457 example, as chemogenetic tools (Fukabori et al., 2020)) or design  
458 pharmacological manipulators to control the olfactory-guided behaviors of pest  
459 insects.

460

## 461 **Acknowledgements**

462

463 We thank Roman Arguello, Jean Hausser, Michael Shahandeh and other  
464 members of the Benton laboratory for discussions and comments on the  
465 manuscript. We thank Tom Baden for help with Igor analysis and Liliane Abuin  
466 and Steeve Cruchet for technical assistance. H.R.S. was supported by an EMBO  
467 Long-Term Fellowship (ALTF 940-2019) and a Helen Hay Whitney Foundation  
468 Fellowship. L.L.P.-G.'s laboratory was supported by a European Research  
469 Council (ERC) Starting Investigator Grant (802531), and the Francis Crick  
470 Institute, which receives its core funding from Cancer Research UK (FC001594),  
471 the UK Medical Research Council (FC001594), and the Wellcome Trust  
472 (FC001594). Work in R.B.'s laboratory was supported by ERC Consolidator and  
473 Advanced Grants (615094 and 833548, respectively), an HFSP Young  
474 Investigator Award (RGY0073/2011), the Swiss National Science Foundation  
475 Nano-Tera Envirobot project (20NA21\_143082). For the purpose of Open

476 Access, the authors have applied a CC BY public copyright license to any Author  
477 Accepted Manuscript version arising from this submission.

478

479 **Author contributions**

480

481 L.L.P.-G. and R.B. conceived the project. L.L.P.-G. designed and performed all  
482 experiments and analyses, except for the ligand docking studies, which were  
483 performed by H.R.S. All authors contributed to interpretation of results. L.L.P.-G.  
484 and R.B. wrote the paper, with contributions from H.R.S.

## 485 **Materials and methods**

486

### 487 ***Drosophila* strains and culture**

488

489 Flies were maintained at 25°C in 12 h light:12 h dark conditions. We used the  
490 following published *D. melanogaster* strains: *Ir84a*<sup>Gal4</sup> (Grosjean et al., 2011),  
491 *UAS-Dmellr75a*, *UAS-Dseclr75a*, *UAS-Dmellr75a*<sup>T289S,Q536K,F538L</sup> (Prieto-Godino  
492 et al., 2016). Other drosophilid species were obtained from the *Drosophila*  
493 Species Stock Center: *D. sechellia* (14021-0248.25), *D. simulans* (14021-  
494 0251.195), *D. yakuba* (14021-0261.01), *D. erecta* (14021-0224.01), *D.*  
495 *ananassae* (14024-0371.13), *D. pseudoobscura* (14011-0121.94), *D. willistoni*  
496 (14030-0811.24), *D. mojavensis* (15081-1352.22), *D. virilis* (15010-1051.87).

497

### 498 **Molecular biology**

499

500 cDNAs of *D. melanogaster* and *D. sechellia* *Ir75a* and *Ir75b* were previously  
501 described (Prieto-Godino et al., 2017, 2016). Site-directed mutagenesis was  
502 performed using standard procedures, and mutant cDNAs were subcloned into  
503 *pUAST attB* for transgenesis of *D. melanogaster* using the phiC31 site-specific  
504 integration system (landing site attP40) by BestGene Inc. and Genetic Services  
505 Inc. All transgenes were sequence-verified both before and after transformation.

506

### 507 **Ancestral protein reconstruction**

508

509 The 16 “modern” sequences of IR75a shown in Figure 2 – figure supplement 1  
510 were used to computationally infer the ancestral sequences at all of the nodes of  
511 the tree using the known phylogeny. Ancestral sequences were calculated using  
512 the bio-informatic tool FastML (Ashkenazy et al., 2012) with rate variation  
513 modelled as a gamma distribution. The marginal posterior probability for most of  
514 the amino acids of all of the reconstructed nodes was above 0.8. For the hot-spot  
515 mutation the marginal posterior probability was 1. To ascertain the robustness of  
516 the inferences made by FastML, we also inferred ancestral sequences of the  
517 nodes using a different bioinformatic tool, codeml within the PAML package. The  
518 inferred sequences had a global identity of 96.5% and were fully identical at the  
519 three amino acid substitutions under study. DNA sequences encoding the  
520 IR75a<sup>Dros</sup> and the IR75a<sup>obs-mel</sup> sequences predicted by FastML were synthesized  
521 by Eurofins-Genomics, subcloned into *pUAST attB* and transformed into flies as  
522 described above.

523

### 524 ***In vivo* electrophysiology**

525

526 Single sensillum extracellular recordings were performed essentially as described  
527 in (Benton and Dahanukar, 2011; Prieto-Godino et al., 2017). For all stimuli, 10 µl  
528 odor (10% v/v in water) were use, and presented to the animal in a 1 s pulse. ac2  
529 sensilla were identified in different species by targeting sensilla at antennal  
530 locations where ac2 are found in *D. melanogaster*, and using pyridine as a  
531 diagnostic odor, which activates the ac2 neuron expressing IR41a and appears to  
532 be conserved across species (Figure 1B). CAS numbers and sources of odors

533 are as follows: formic acid (64-18-6), acetic acid (64-19-7), propionic acid (79-09-  
534 4), butyric acid (107-92-6), pentanoic acid (109-52-4), hexanoic acid (142-62-1),  
535 pyridine (110-86-1) (diagnostic for ac2), octanol (111-87-5) (diagnostic for ac3).  
536 Odor-evoked responses were calculated by summing the activity of all OSNs in a  
537 sensillum to a given stimulus, as reliable spike-sorting is not possible and other  
538 neurons housed in the ac2 or ac4 sensilla do not respond to acidic odors  
539 (Silbering et al., 2011). We counted the number of spikes in a 500 ms window at  
540 stimulus delivery (200 ms after stimulus onset due to a delay introduced by the air  
541 path), subtracted the number of spikes in a 500 ms window 2 s before stimulus  
542 delivery, and doubled the result to obtain spikes/s. To calculate solvent-corrected  
543 responses (as shown in the figures), we subtracted from the response to each  
544 diluted odor, the response obtained when stimulating with the corresponding  
545 solvent (water for all odors except for pyridine and octanol, which were dissolved  
546 in paraffin oil (8012-95-1). A maximum of three sensilla were tested per animal,  
547 and individual genotypes were measured, in an interleaved fashion, on multiple  
548 independent days. Normalized responses were calculated by dividing solvent-  
549 corrected responses of a given sensillum to each odor by the maximal response  
550 of that sensillum, such that each sensillum always had one odor whose  
551 normalized response was 1. A pre-requisite for PCA analysis is to input z-scored  
552 responses; these were calculated with the in-built function of MATLAB, which  
553 works according to the definition of z-scoring, i.e., across each sensillum  
554 recording, each response was subtracted from the mean response of all sensillar  
555 responses and divided by the standard deviation.

556

## 557 **Statistical analysis**

558

559 Principal component analysis was carried with in-built MATLAB functions.  
560 Statistical analyses were carried out with in-built functions in R Studio or Igor. For  
561 all statistical tests, a Shapiro test for normality was first performed. If both samples  
562 being compared were normally distributed, a t-test was performed; if one of the  
563 samples was not normally distributed, a Wilcoxon test was run. When performing  
564 multiple comparisons, p-values were corrected using the Bonferroni method.  
565 Epistasis was calculated by determining whether the effects of each individual  
566 mutation were added linearly by comparing the observed responses of the  
567 combination of two genetic manipulations with the expected distribution of  
568 individual mutations were added linearly. Briefly, to generate expected  
569 distributions for the linear combination of two mutations, we subtracted the mean  
570 responses of the initial receptor from the two “intermediate” receptors, this  
571 provides the “effect” of each mutation(s) individually, we then we took 1000  
572 random samples from the “effects” of each of the two mutations and summed  
573 them to generate a distribution of the expected responses if the two effects of  
574 each mutation added linearly. To determine whether two mutations interacted  
575 epistatically, we statistically compared the expected distribution with the actual  
576 distribution (the double manipulation combination) using a Wilcoxon test. If the  
577 result of this test was  $p < 0.05$  after correction for multiple comparisons using  
578 Bonferroni method, the two mutations were considered to interact epistatically.

579

580

## 581 **Ligand docking**

582

583 AutoDock Vina version 1.1.2 (Trott and Olson, 2009) was used to dock ligands  
584 into homology models of the LBDs of *DmeII*R75a and *DmeII*R84a (K205-N354-  
585 L451-W583) (Prieto-Godino et al., 2016) . The crystal structure of *Rnor*GluA2  
586 bound to glutamate (PDB accession 1FTJ) was used to optimize the grid  
587 conditions and docking procedure for IRs. A12×12×12 Å grid was placed along  
588 the axis between the CZ atom in a conserved arginine residue (R96 in  
589 *Rnor*GluA2, R100 in *DmeII*R75a) and the CD atom in a conserved glutamate  
590 residue (E193 in *Rnor*GluA2, E197 in the IR75a, this glutamate is not conserved  
591 in *DmeII*R84a). The center of the grid was placed closer to the arginine than to  
592 the glutamate, such that if a straight line was drawn from the arginine to the  
593 glutamate, the grid center was one-third of the way along this line. For  
594 *DmeII*R84a, the conserved glutamate is not present, and the position of the grid  
595 was manually determined using the conserved arginine (R317) as a guide and  
596 the grids for RnGluA2 and IR75a as reference. Docking was performed using an  
597 exhaustiveness of 8, with the default settings for AutoDock Vina; these were  
598 sufficient to accurately predict the position of the co-crystallized glutamate in  
599 RnGluA2 (Figure 4 – figure supplement 1). Ligand poses were inspected  
600 manually, but in all cases the top-ranked pose was judged to be the most  
601 plausible. Structure visualization was performed using PyMol version 2.3.3. The  
602 *Dsecl*R75b LBD model (Prieto-Godino et al., 2017) was aligned to the GluA2  
603 homotetramer using the “align” command in PyMol.

604

605



## 606 Figure Legends

### 607 **Figure 1. Evolution of olfactory responses of Ir75a neurons across the** 608 **drosophilid phylogeny.**

609 (A) Phylogeny of analyzed drosophilid species and their known ecological niches  
610 (Markow, 2015).

611 (B) Representative traces of extracellular recordings of neuronal responses in  
612 antennal coeloconic 2 (ac2) sensilla (schematized top left) to the indicated odors  
613 in different drosophilid species. ac2 sensilla were identified based on their  
614 morphology, their location on the antennal surface – either near the entry to the  
615 sacculus or in the distal posterior part intermingled with ac3 sensilla (Silbering et  
616 al., 2011) – their pattern of basal firing, and the conserved responses of the Ir41a  
617 neuron towards pyridine and the lack of response to octanol (which is detected by  
618 the Or35a neuron in ac3 sensilla (Yao et al., 2005)).

619 (C) Heatmap of electrophysiological solvent-corrected responses (see Materials  
620 and methods) of ac2 sensilla of all species in (A) to a series of linear carboxylic  
621 acids; the color-scale is on the right. Each rectangle represents the responses  
622 measured in a single sensillum.

623 (D) Loadings of the first principal component of all responses shown in (C).

624 (E) Responses of ac2 sensilla for all species plotted as z-scored responses (see  
625 Material and methods) of C2 against z-scored responses to C4. This plotting  
626 reveals two clear clusters with species responding maximally to C2 (orange) or  
627 C4 (blue).

628

629 **Figure 1 Source data 1.** Data for Figure 1 showing the solvent-corrected  
630 spikes/second responses of ac2 sensilla for each of the species (Figure 1C). The  
631 same responses z-scored (Figure 1E) and the results of the PCA analysis,  
632 showing loadings and variance explained by each PC (Figure 1D). Here and in  
633 subsequent source data files “NaN” (“not a number”) indicates cases where data  
634 was not available, usually due to the electrode coming out of the sensillum before  
635 the end of the series of stimulations.

636

### 637 **Figure 2. Ancestral sequence reconstruction of IR75a.**

638 (A) Phylogeny of the protein sequences of drosophilid IR75a orthologs used for  
639 the reconstruction of ancestral nodes (IR75a<sup>Dros</sup> and IR75a<sup>mel-obs</sup>) (see Figure 2 –  
640 figure supplement 1). The orange and blue dots indicate maximal responses of  
641 the corresponding neurons to C2 and C4, respectively (Figure 1C). The branches  
642 of the tree have been similarly color-coded according to predicted receptor  
643 responses based on parsimony.

644 (B) Representative traces of extracellular recordings of neuronal responses to the  
645 indicated odors of receptors expressed in the IR decoder neuron (see text).  
646 Genotypes are of the form: *UAS-xxx/UAS-xxx;Ir84a<sup>Gal4</sup>/Ir84a<sup>Gal4</sup>*, here and in all  
647 subsequent figures.

648 (C) Quantification of responses of the indicated receptors expressed in the IR  
649 decoder neuron. In this and subsequent similar figure panels, the top row shows  
650 barplots of responses normalized by maximal response, and the bottom row  
651 shows individual datapoints, mean and SEM of raw solvent-corrected responses  
652 to odor stimuli.

653

654 **Figure 2 – figure supplement 1. Alignment of IR75a orthologs.**

655 Multiple sequence alignment of IR75a orthologs used for the ancestral protein  
656 reconstruction. The ancestral versions that were functionally tested, IR75a<sup>Dros</sup> and  
657 IR75a<sup>obs-mel</sup>, are also shown. Dark blue indicates identical residues, light blue  
658 indicates similar residues, grey indicates dissimilar residues. The red lines  
659 indicate the spans of S1 and S2 lobes of the LBD. The amino acids colored in red  
660 are those positions that were estimated by FASTML (see Materials and methods)  
661 to have a marginal posterior probability < 0.7.

662

663 **Figure 2 Source data 1.** Data for Figure 1C, responses in spikes/s of ac2  
664 sensilla from each of the genotypes, and normalized with respect the maximal  
665 response of each sensilla.

666

667 **Figure 3. Mapping the evolutionary landscape of IR75a.**

668 (A) Top: cartoon of the domain organization of IR75a; bottom: protein homology  
669 model of the *Dme*IR75a LBD (adapted from (Prieto-Godino et al., 2016)). The  
670 three functionally-important amino acid positions that differ between *Dme*IR75a  
671 and *Dsecl*IR75a are highlighted in red.

672 (B-C) Quantification of responses of the indicated receptor versions expressed in  
673 the IR decoder neuron.

674 (D) Loadings of the first principal component of all responses shown in (C).

675 (E) Responses of each of the indicated receptor versions plotted in the C2 vs C4  
676 space.

677 (F) Visualization of epistasis and accessible mutational pathways. Each of the  
678 individual, double and triple mutations are plotted in the PC1 axis (error bars are  
679 standard error of the mean). Possible evolutionary paths join these with lines.  
680 Solid lines indicate when the path joins two points that significantly increase PC1  
681 value (i.e. increased responses to C4 and C5 and decreased responses to C2);  
682 dashed lines denote paths that, while accessible, do not lead to significantly  
683 increased PC1 values (see Source Data, for statistical values). Red lines indicate  
684 the cases where two mutations interact epistatically when combined, i.e., the  
685 combination of the two mutations is not equal to the expected response if their  
686 effects added linearly (see Materials and methods for details and Source Data for  
687 statistical values).

688

689 **Figure 3 Source data 1.** First tab: Data for Figure 3B and 3C, responses in  
690 spikes/second of ac2 sensilla from each of the genotypes indicated, and  
691 normalized with respect the maximal response of each sensilla. Second tab:  
692 Results from the PCA analysis. Third tab: P-values resulting from the statistical  
693 analysis in Figure 3F.

694

695 **Figure 4. A hotspot for tuning IR sensitivity.**

696 (A) Phylogeny of species' IR75a receptors used for the reconstruction of  
697 ancestral nodes. The inferred identity of hotspot mutation for key nodes is shown  
698 as well as for each of the extant receptors at the end of each leaf, together with  
699 the measured (solid circle) or predicted (empty circle) sensitivity. On the right, the  
700 nucleotides encoding the hotspot amino acid position in IR75a across species.

701 *Drosophila* species abbreviations (where not presented in Figure 1): *Dmir*  
702 (*miranda*), *Dper* (*persimilis*), *Dame* (*americana*), *Dbuz* (*buzzatii*), *Dgri*  
703 (*grimshawi*), *Dalb* (*albomicans*).

704 (B) Top: Protein sequence alignment of *DmeII*R75a and *DmeII*R75b. Dark blue  
705 indicates identical residues, light blue indicates similar residues, grey indicates  
706 dissimilar residues. The red lines indicate the spans of S1 and S2 lobes of the  
707 LBD. The red box indicates the common amino acid position (“hotspot”). Bottom:  
708 separate alignments of the hotspot region in IR75a and IR75b for *D.*  
709 *melanogaster* and *D. sechellia* proteins showing that while the residue position is  
710 conserved, the identity of the amino acids is different for these two receptors.

711 (C) Left: homology model of *DmeII*R75a LBD (blue) with docked ligands; the  
712 insets show the top-ranked poses for C2 (cyan) and C4 (purple) in the LBD  
713 pocket. Right: crystal structure of the *Rattus norvegicus* (*Rnor*) iGluR GluA2 LBD  
714 (gray) in complex with glutamate (yellow) (PDB accession 1FTJ). The hotspot  
715 residue is shown in orange in *DmeII*R75a, and the equivalent residue in  
716 *Rnor*GluA2 in magenta. Amino acid numbering corresponds to that of the full-  
717 length sequence.

718

#### 719 **Figure 4 – figure supplement 1. Ligand docking in IRs and iGluRs.**

720 Top-three docked poses for the indicated ligands in the *DmeII*R75a and  
721 *DmeII*R84a LBD homology models, and the *Rnor*GluA2/glutamate crystal  
722 structure (PDB 1FTJ), ranked by AutoDock Vina docking score. In *DmeII*R75a, all  
723 three poses of C2 occupy a similar space in the binding pocket, contacting the  
724 conserved arginine R297 and >4 Å from the hotspot residue 538 (orange).  
725 Similarly, in *DmeII*R84a, all three poses of phenylacetic acid occupy a similar  
726 position in the binding pocket and make contact with the conserved arginine  
727 R317, which is essential for ligand-evoked currents from IR84a *in vivo* (Abuin et  
728 al., 2011). In *Rnor*GluA2, the docked poses of docked glutamate (green),  
729 particularly the top-ranked pose, are similar to the positioning of co-crystallized  
730 glutamate (yellow). Amino acid numbering corresponds to that of the full-length  
731 sequences.

732

#### 733 **Figure 5. Epistasis in the ligand binding domain of IR75b.**

734 (A) Quantification of responses of the indicated wildtype and mutated IR75b  
735 variants expressed in the IR decoder neuron. Note that the *DmeII*R75b<sup>DsecS1</sup>  
736 variant includes the six derived changes between *D. sechellia* and *D. simulans*/*D.*  
737 *melanogaster* as well as a seventh amino acid substitution common to *D.*  
738 *sechellia* and *D. simulans* receptors.

739 (B) Protein homology model of the *Dsecl*R75b LBD (adapted from (Prieto-Godino  
740 et al., 2017)). The S1 and S2 lobes are colored pale and dark green, respectively.  
741 Surface-located amino acids that differ between *DmeII*R75b and *Dsecl*R75b in  
742 the S1 domain are depicted in magenta; the hotspot (position 523) and other  
743 residues in the ligand-binding pocket in the S2 domain are depicted in red.

744 (C) Homology model of the *DmeII*R75b LBD (colored as in (B)) aligned to the full-  
745 length homotetrameric crystal structure of *Rnor*GluA2 (PDB accession 3KG2),  
746 which is colored by chain in faded gray, red, blue, and yellow. The *Rnor*GluA2  
747 amino-terminal domain (which is not present in most IRs (Rytz et al., 2013)) has  
748 been removed for clarity.

749

750 **Figure 5 Source data 1.** First tab: Data for Figure 5A, responses in  
751 spikes/second of ac2 sensilla from each of the genotypes indicated, and  
752 normalized with respect to the maximal response of each sensilla. Second tab: P-  
753 values resulting from the statistical analysis, as discussed in the text.

754

755 **Supplementary file 1. Nucleotide sequences encoding the reconstructed**  
756 **ancestral IR75a orthologs.**

757

## 758 **References**

759

- 760 Abuin L, Bargeton B, Ulbrich MH, Isacoff EY, Kellenberger S, Benton R. 2011.  
761 Functional Architecture of Olfactory Ionotropic Glutamate Receptors. *Neuron*.  
762 Abuin L, Prieto-Godino LL, Pan H, Gutierrez C, Huang L, Jin R, Benton R. 2019.  
763 In vivo assembly and trafficking of olfactory Ionotropic Receptors. *BMC Biol*  
764 **17**. doi:10.1186/s12915-019-0651-7  
765 Adipietro KA, Mainland JD, Matsunami H. 2012. Functional evolution of  
766 Mammalian odorant receptors. *PLoS Genet* **8**:e1002821.  
767 doi:10.1371/journal.pgen.1002821  
768 Aguilar-Rodríguez J, Payne JL, Wagner A. 2017. A thousand empirical adaptive  
769 landscapes and their navigability. *Nat Ecol Evol*. doi:10.1038/s41559-016-  
770 0045  
771 Amlou M, Moreteau B, David JR. 1998. Genetic analysis of *Drosophila sechellia*  
772 specialization: Oviposition behavior toward the major aliphatic acids of its  
773 host plant. *Behav Genet*. doi:10.1023/A:1021689312582  
774 Arguello JR, Cardoso-Moreira M, Grenier JK, Gottipati S, Clark AG, Benton R.  
775 2016. Extensive local adaptation within the chemosensory system following  
776 *Drosophila melanogaster*'s global expansion. *Nat Commun* **7**:11855.  
777 doi:10.1038/ncomms11855  
778 Armstrong N, Gouaux E. 2000. Mechanisms for Activation and Antagonism of an  
779 AMPA-Sensitive Glutamate Receptor: Crystal Structures of the GluR2 Ligand  
780 Binding Core. *Neuron*.  
781 Ashkenazy H, Penn O, Doron-Faigenboim A, Cohen O, Cannarozzi G, Zomer O,  
782 Pupko T. 2012. FastML: A web server for probabilistic reconstruction of  
783 ancestral sequences. *Nucleic Acids Res*. doi:10.1093/nar/gks498  
784 Auer TO, Khallaf MA, Silbering AF, Zappia G, Ellis K, Álvarez-Ocaña R, Arguello  
785 JR, Hansson BS, Jefferis GSXE, Caron SJC, Knaden M, Benton R. 2020.  
786 Olfactory receptor and circuit evolution promote host specialization. *Nature*.  
787 doi:10.1038/s41586-020-2073-7  
788 Bargmann CI. 2006. Comparative chemosensation from receptors to ecology.  
789 *Nature*. doi:10.1038/nature05402  
790 Becher PG, Bengtsson M, Hansson BS, Witzgall P. 2010. Flying the fly: Long-  
791 range flight behavior of *Drosophila melanogaster* to attractive odors. *J Chem*  
792 *Ecol*. doi:10.1007/s10886-010-9794-2  
793 Benton R, Dahanukar A. 2011. Electrophysiological recording from *Drosophila*  
794 olfactory Sensilla. *Cold Spring Harb Protoc*. doi:10.1101/pdb.prot5630  
795 Benton R, Vannice KS, Gomez-Diaz C, Vosshall LB. 2009. Variant ionotropic



- 796 glutamate receptors as chemosensory receptors in *Drosophila*. *Cell*.  
797 Block E. 2018. Molecular Basis of Mammalian Odor Discrimination: A Status  
798 Report. *J Agric Food Chem*. doi:10.1021/acs.jafc.8b04471  
799 Butterwick JA, del Marmol J, Kim KH, Kahlson MA, Rogow JA, Walz T, Ruta V.  
800 2018. Cryo-EM structure of the insect olfactory receptor Orco. *Nature*.  
801 doi:10.1038/s41586-018-0420-8  
802 Carey AF, Wang G, Su C-YY, Zwiebel LJ, Carlson JR. 2010. Odorant reception in  
803 the malaria mosquito *Anopheles gambiae*. *Nature* 1–7.  
804 doi:10.1038/nature08834  
805 Chen M, Peng ZG, He SP. 2010. Olfactory receptor gene family evolution in  
806 stickleback and medaka fishes. *Sci China Life Sci*. doi:10.1007/s11427-010-  
807 0025-4  
808 Croset V, Rytz R, Cummins SF, Budd A, Brawand D, Kaessmann H, Gibson TJ,  
809 Benton R. 2010. Ancient protostome origin of chemosensory ionotropic  
810 glutamate receptors and the evolution of insect taste and olfaction. *PLoS*  
811 *Genet*.  
812 Dekker T, Ibbá I, Siju KP, Stensmyr MC, Hansson BS. 2006. Olfactory shifts  
813 parallel superspecialism for toxic fruit in *Drosophila melanogaster* sibling, *D.*  
814 *sechellia*. *Curr Biol* **16**:101–109. doi:10.1016/j.cub.2005.11.075  
815 Del Marmol J, Yedlin M, Ruta V. 2021. The structural basis of odorant recognition  
816 in insect olfactory receptors. *bioRxiv*.  
817 Farine J-PP, Legal L, Moreteau B, Le Quere jean-LL. 1996. Volatile components  
818 of ripe fruits of *Morinda citrifolia* and their effects on *Drosophila*.  
819 *Phytochemistry* 1–6. doi:10.1016/0031-9422(95)00455-6  
820 Fukabori R, Iguchi Y, Kato S, Takahashi K, Eifuku S, Tsuji S, Hazama A,  
821 Uchigashima M, Watanabe M, Mizuma H, Cui Y, Onoe H, Hikishima K,  
822 Yasoshima Y, Osanai M, Inagaki R, Fukunaga K, Nishijo T, Momiyama T,  
823 Benton R, Kobayashi K. 2020. Enhanced retrieval of taste associative  
824 memory by chemogenetic activation of locus coeruleus norepinephrine  
825 neurons. *J Neurosci*. doi:10.1523/JNEUROSCI.1720-20.2020  
826 Gardiner A, Butlin RK, Jordan WC, Ritchie MG. 2009. Sites of evolutionary  
827 divergence differ between olfactory and gustatory receptors of *Drosophila*.  
828 *Biol Lett*. doi:10.1098/rsbl.2008.0723  
829 Gorter JA, Jagadeesh S, Gahr C, Boonekamp JJ, Levine JD, Billeter J-CC. 2016.  
830 The nutritional and hedonic value of food modulate sexual receptivity in  
831 *Drosophila melanogaster* females. *Sci Rep* **6**:19441. doi:10.1038/srep19441  
832 Grosjean Y, Rytz R, Farine J-P, Abuin L, Cortot J, Jefferis GSXE, Benton R.  
833 2011. An olfactory receptor for food-derived odours promotes male courtship  
834 in *Drosophila*. *Nature*.  
835 Hallem EA, Carlson JR. 2006. Coding of Odors by a Receptor Repertoire. *Cell*  
836 **125**:143–160. doi:10.1016/j.cell.2006.01.050  
837 Holder KK, Bull JJ. 2001. Profiles of adaptation in two similar viruses. *Genetics*.  
838 Joseph RM, Devineni A V., King IFGG, Heberlein U. 2009. Oviposition preference  
839 for and positional avoidance of acetic acid provide a model for competing  
840 behavioral drives in *Drosophila*. *Proc Natl Acad Sci U S A* **106**:11352–11357.  
841 doi:10.1073/pnas.0901419106  
842 Kim G, Huang JH, McMullen JG, Newell PD, Douglas AE. 2018. Physiological  
843 responses of insects to microbial fermentation products: Insights from the



- 844 interactions between *Drosophila* and acetic acid. *J Insect Physiol.*  
845 doi:10.1016/j.jinsphys.2017.05.005
- 846 Leary GP, Allen JE, Bunger PL, Luginbill JB, Linn CE, Macallister IE, Kavanaugh  
847 MP, Wanner KW. 2012. Single mutation to a sex pheromone receptor  
848 provides adaptive specificity between closely related moth species. *Proc Natl*  
849 *Acad Sci U S A* **109**:14081–14086. doi:10.1073/pnas.1204661109
- 850 Mainland JD, Keller A, Li YR, Zhou T, Trimmer C, Snyder LL, Moberly AH,  
851 Adipietro KA, Liu WLL, Zhuang H, Zhan S, Lee SS, Lin A, Matsunami H.  
852 2013. The missense of smell: Functional variability in the human odorant  
853 receptor repertoire. *Nat Neurosci* **17**:114–120. doi:10.1038/nn.3598
- 854 Mamonova T, Speranskiy K, Kurnikova M. 2008. Interplay between structural  
855 rigidity and electrostatic interactions in the ligand binding domain of GluR2.  
856 *Proteins Struct Funct Genet* **73**:656–671. doi:10.1002/prot.22090
- 857 Markow TA. 2015. The secret lives of *Drosophila* flies. *Elife* **4**.  
858 doi:10.7554/eLife.06793
- 859 Mayer ML. 2006. Glutamate receptors at atomic resolution. *Nature*.  
860 doi:10.1038/nature04709
- 861 Ni L. 2021. The Structure and Function of Ionotropic Receptors in *Drosophila*.  
862 *Front Mol Neurosci*. doi:10.3389/fnmol.2020.638839
- 863 Orr HA. 2005. The genetic theory of adaptation: A brief history. *Nat Rev Genet*.  
864 doi:10.1038/nrg1523
- 865 Phillips PC. 2008. Epistasis - The essential role of gene interactions in the  
866 structure and evolution of genetic systems. *Nat Rev Genet*.  
867 doi:10.1038/nrg2452
- 868 Prieto-Godino LL, Rytz R, Bargeton B, Abuin L, Arguello JR, Peraro MD, Benton  
869 R. 2016. Olfactory receptor pseudo-pseudogenes. *Nature* **539**.  
870 doi:10.1038/nature19824
- 871 Prieto-Godino LL, Rytz R, Cruchet S, Bargeton B, Abuin L, Silbering AF, Ruta V,  
872 Dal Peraro M, Benton R. 2017. Evolution of Acid-Sensing Olfactory Circuits  
873 in *Drosophilids*. *Neuron* **93**. doi:10.1016/j.neuron.2016.12.024
- 874 Ramdya P, Benton R. 2010. Evolving olfactory systems on the fly. *Trends Genet*.  
875 Randall RN, Radford CE, Roof KA, Natarajan DK, Gaucher EA. 2016. An  
876 experimental phylogeny to benchmark ancestral sequence reconstruction.  
877 *Nat Commun*. doi:10.1038/ncomms12847
- 878 Rytz R, Croset V, Benton R. 2013. Ionotropic Receptors (IRs): Chemosensory  
879 ionotropic glutamate receptors in *Drosophila* and beyond. *Insect Biochem*  
880 *Mol Biol*.
- 881 Saito H, Chi Q, Zhuang H, Matsunami H, Mainland JD. 2009. Odor coding by a  
882 mammalian receptor repertoire. *Sci Signal*. doi:10.1126/scisignal.2000016
- 883 Silbering AF, Rytz R, Grosjean Y, Abuin L, Ramdya P, Jefferis GSXE, Benton R.  
884 2011. Complementary function and integrated wiring of the evolutionarily  
885 distinct *Drosophila* olfactory subsystems. *J Neurosci*.
- 886 Smadja C, Shi P, Butlin RK, Robertson HM. 2009. Large gene family expansions  
887 and adaptive evolution for odorant and gustatory receptors in the pea aphid,  
888 *Acyrtosiphon pisum*. *Mol Biol Evol*. doi:10.1093/molbev/msp116
- 889 Steiger SS, Fidler AE, Mueller JC, Kempnaers B. 2010. Evidence for adaptive  
890 evolution of olfactory receptor genes in 9 bird species. *J Hered*.  
891 doi:10.1093/jhered/esp105

- 892 Trott O, Olson AJ. 2009. AutoDock Vina: Improving the speed and accuracy of  
893 docking with a new scoring function, efficient optimization, and  
894 multithreading. *J Comput Chem*. doi:10.1002/jcc.21334
- 895 Wright S. 1932. The roles of mutation, inbreeding, crossbreeding and selection in  
896 evolution. *Sixth Int Congr Genet*.
- 897 Yang K, Huang LQ, Ning C, Wang CZ. 2017. Two single-point mutations shift the  
898 ligand selectivity of a pheromone receptor between two closely related moth  
899 species. *Elife*. doi:10.7554/eLife.29100
- 900 Yao CA, Ignell R, Carlson JR. 2005. Chemosensory coding by neurons in the  
901 coeloconic sensilla of the *Drosophila* antenna. *J Neurosci* **25**:8359–8367.  
902 doi:10.1523/JNEUROSCI.2432-05.2005
- 903

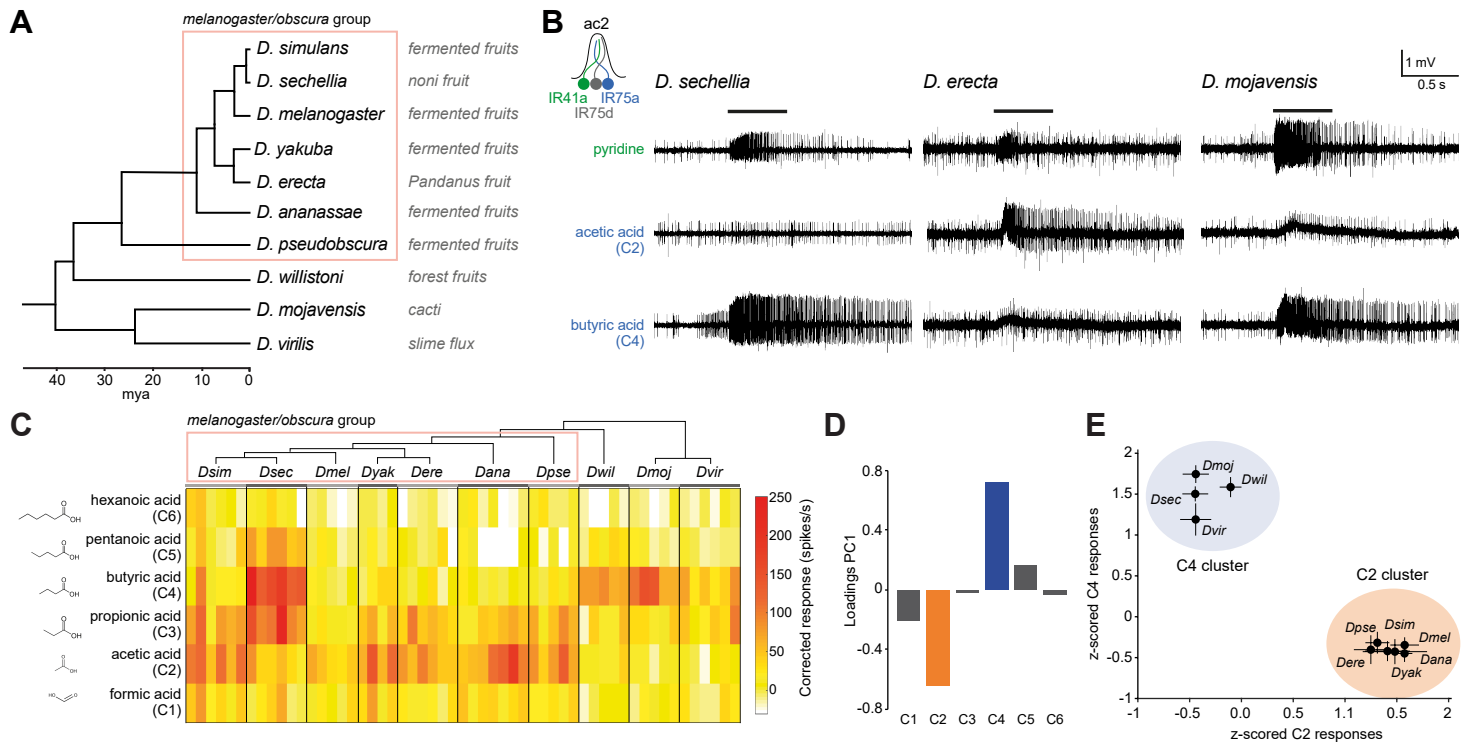

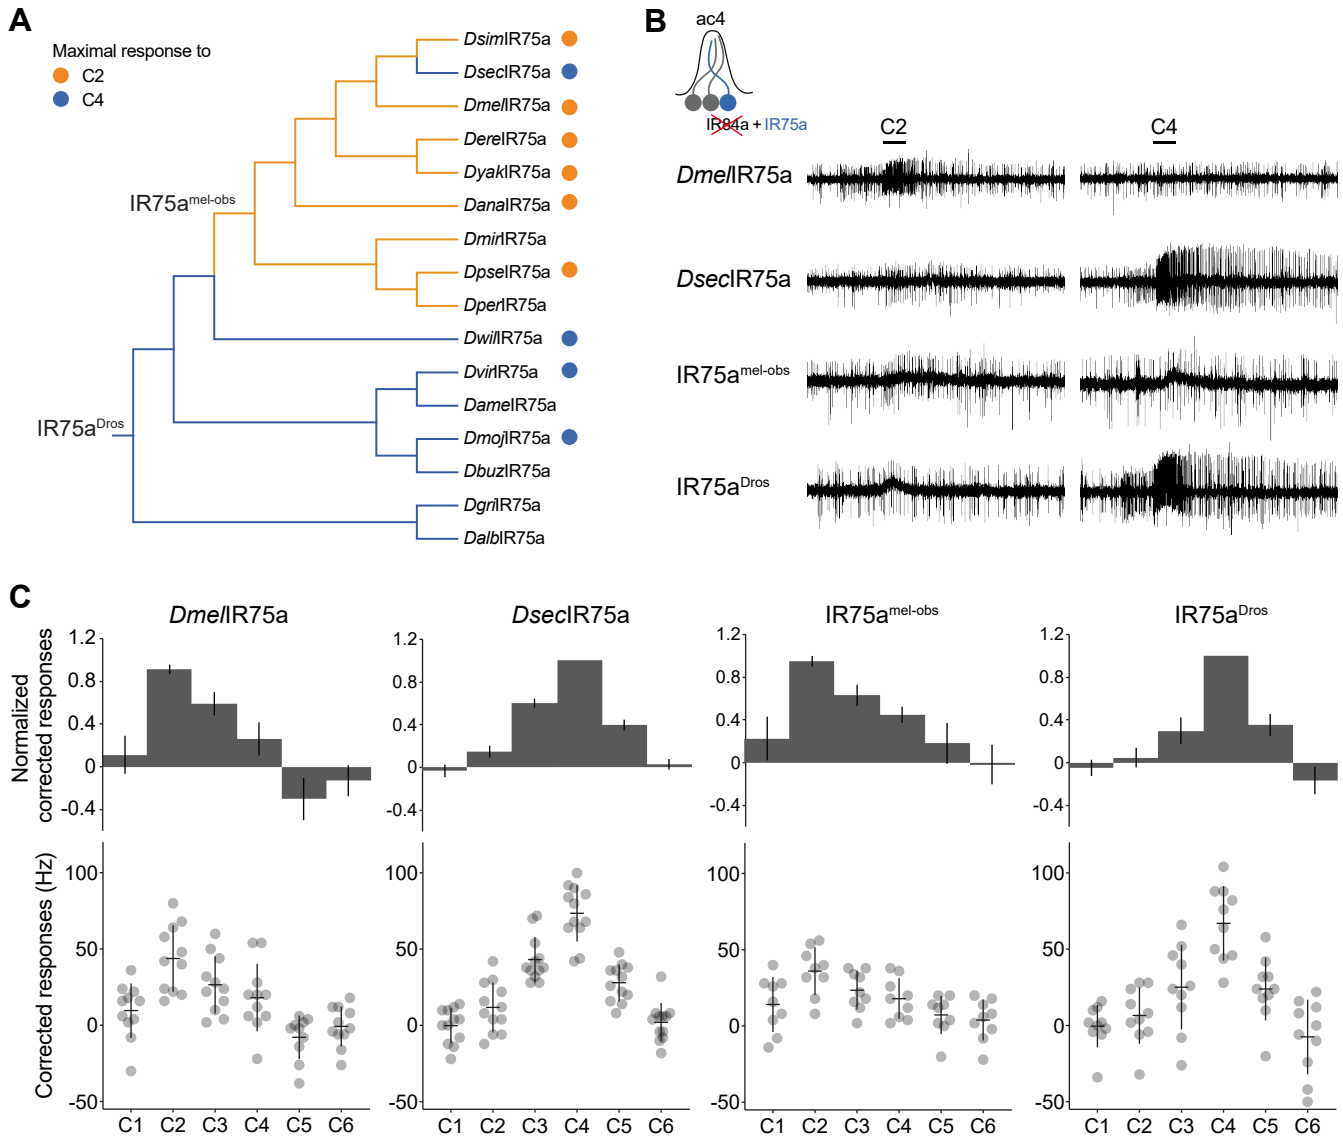

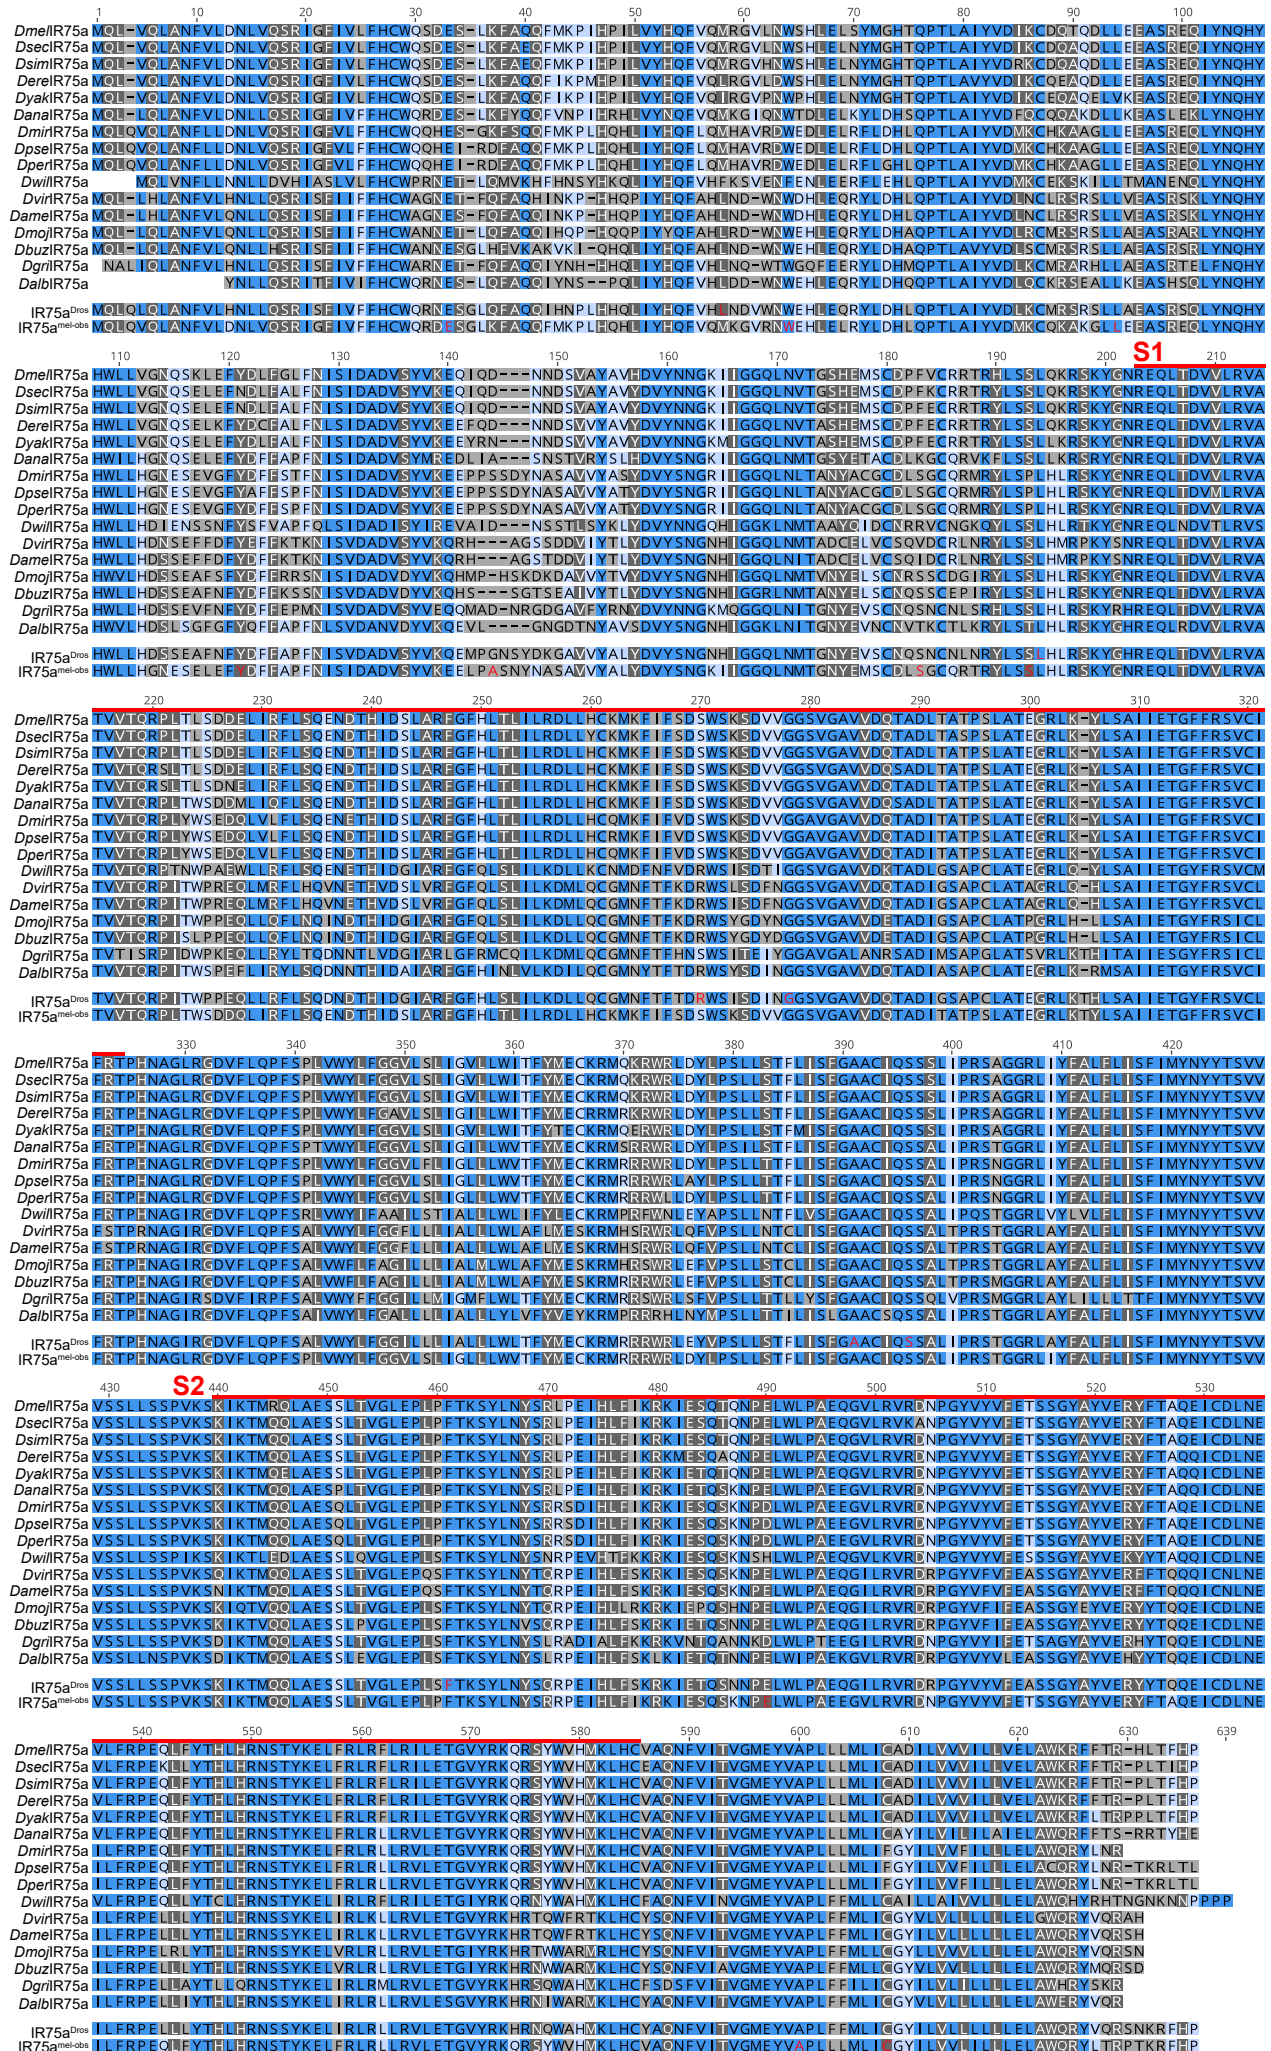



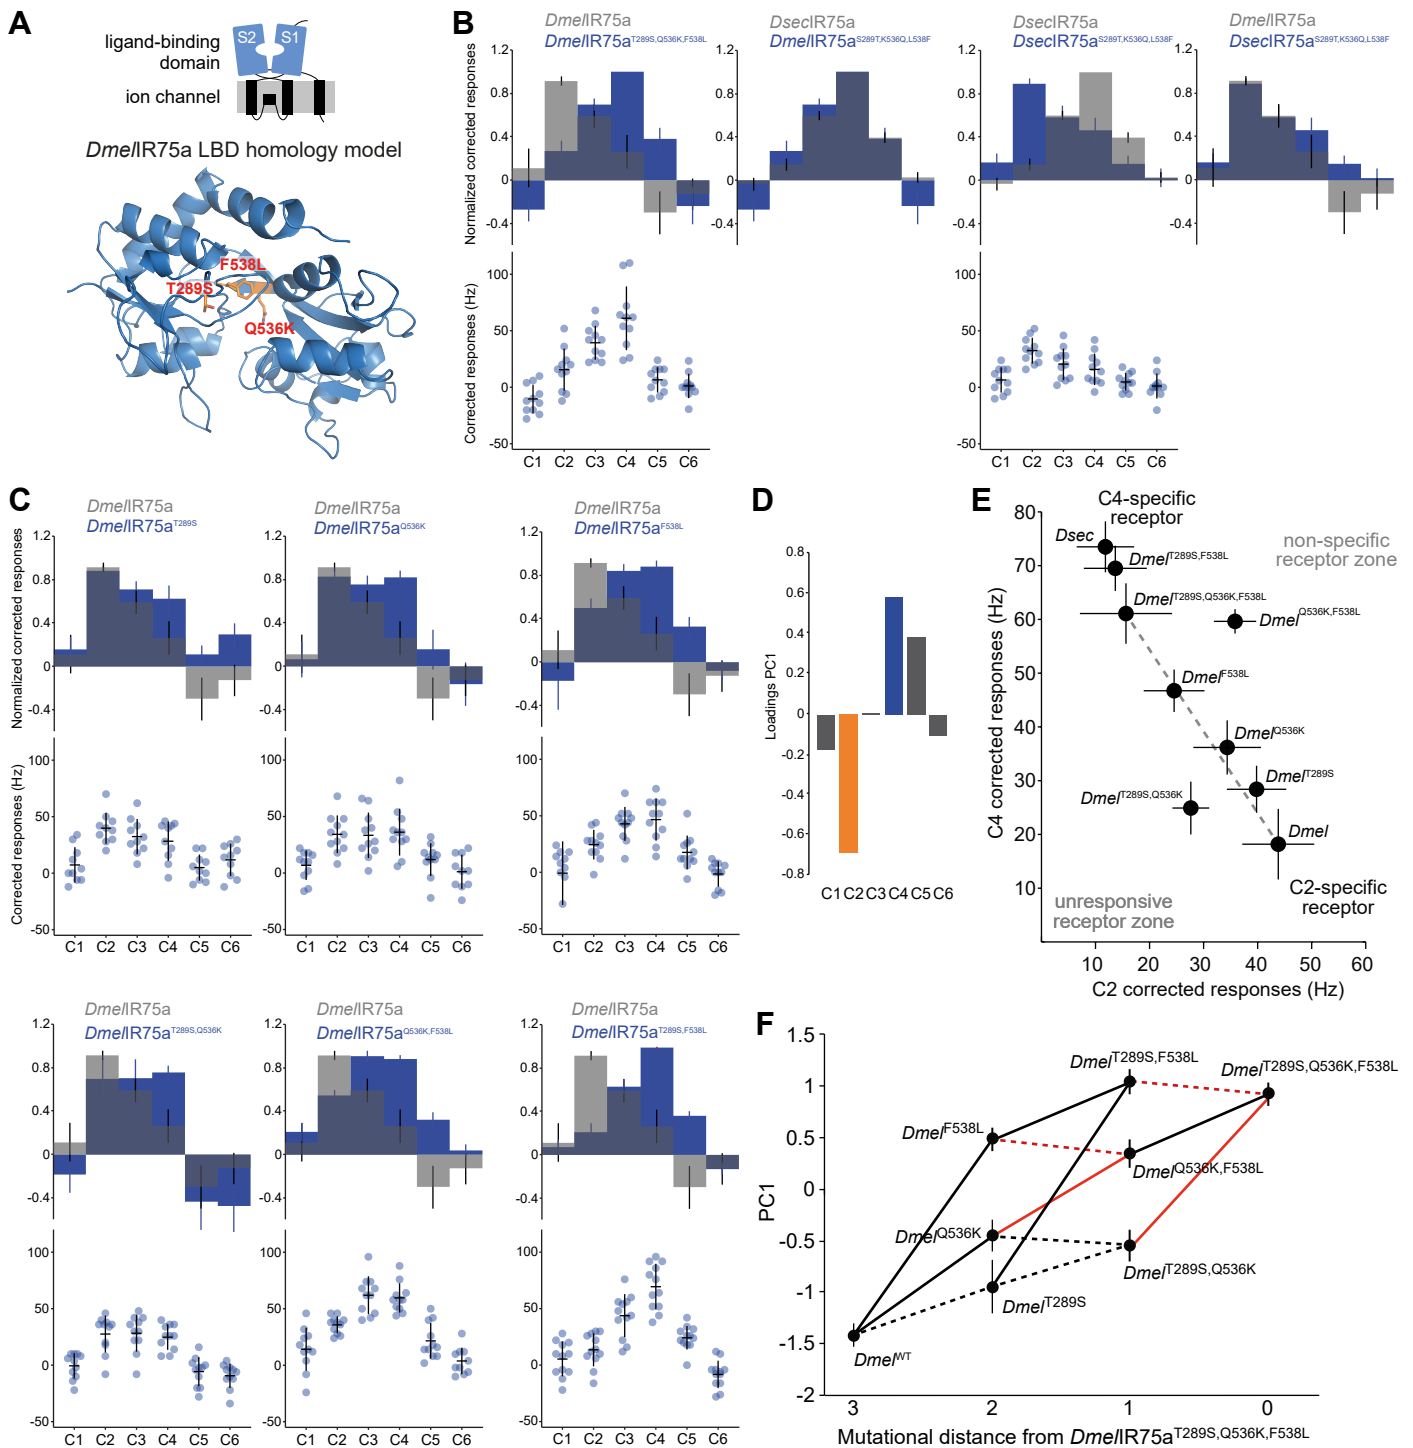

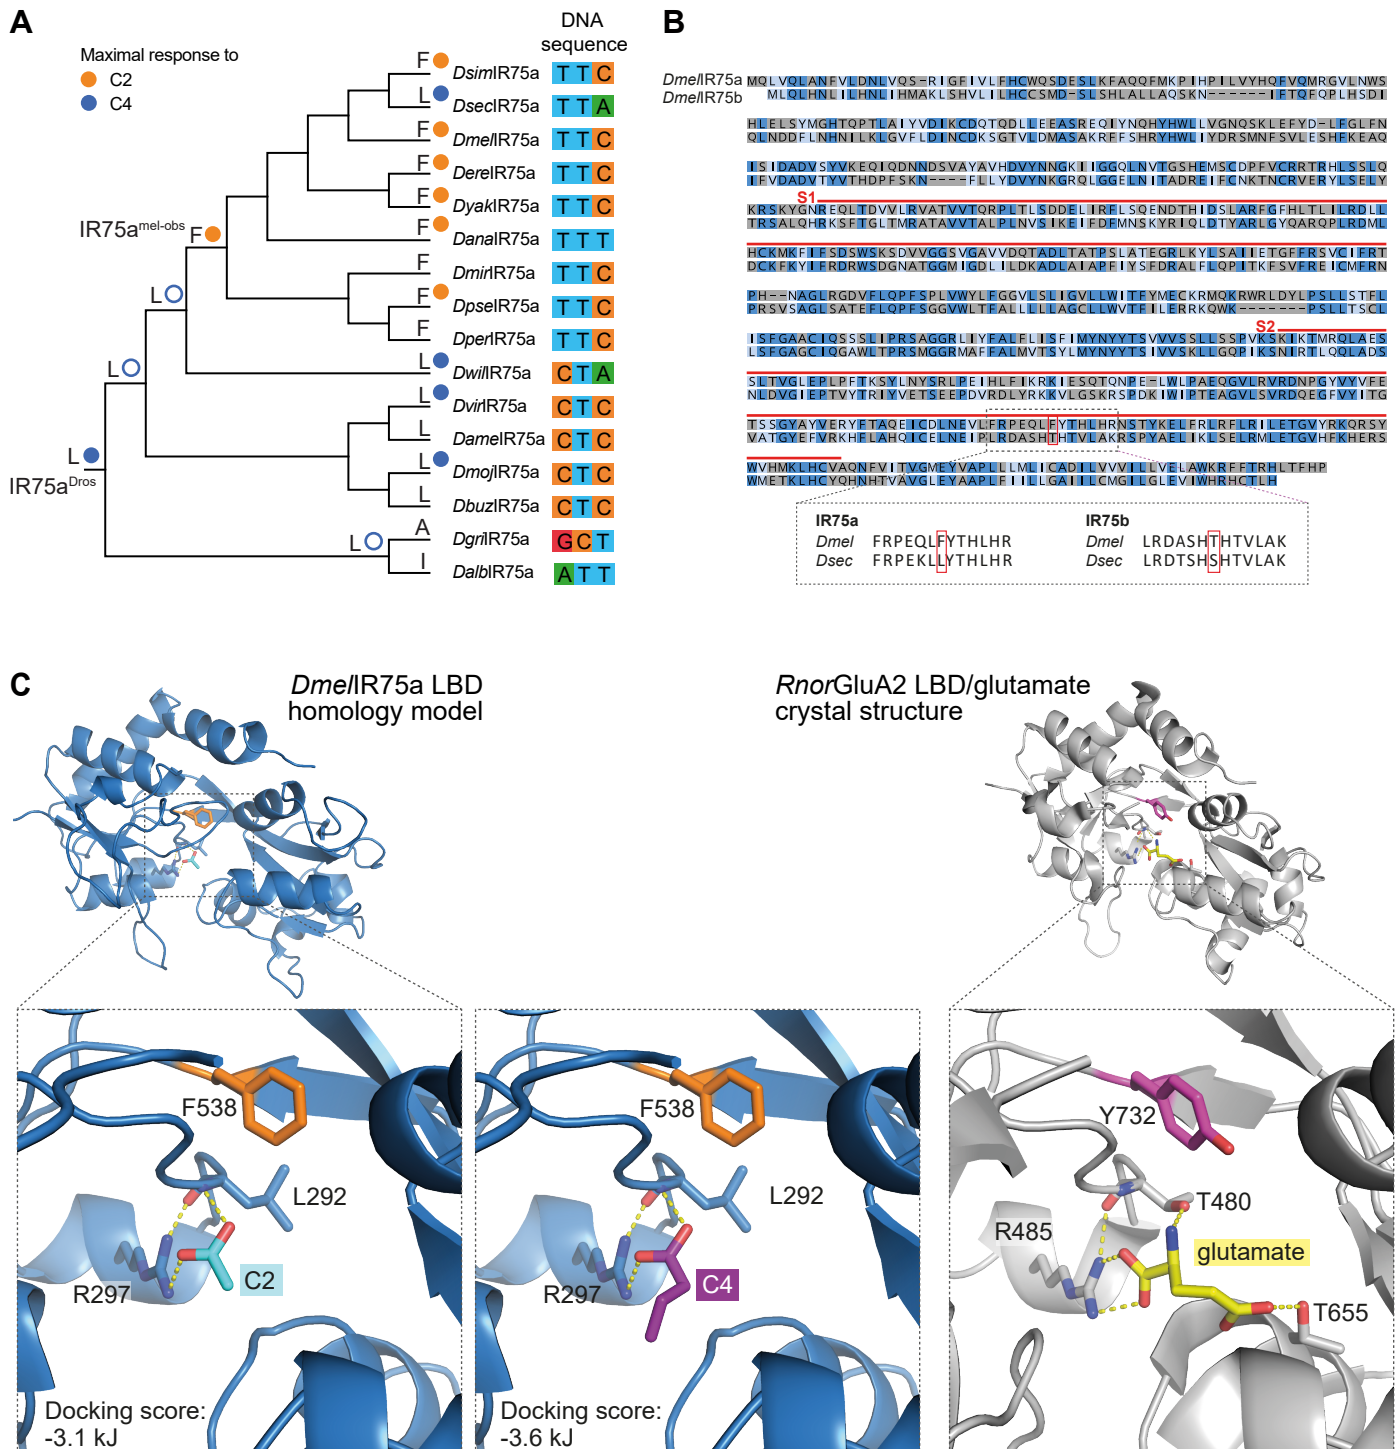

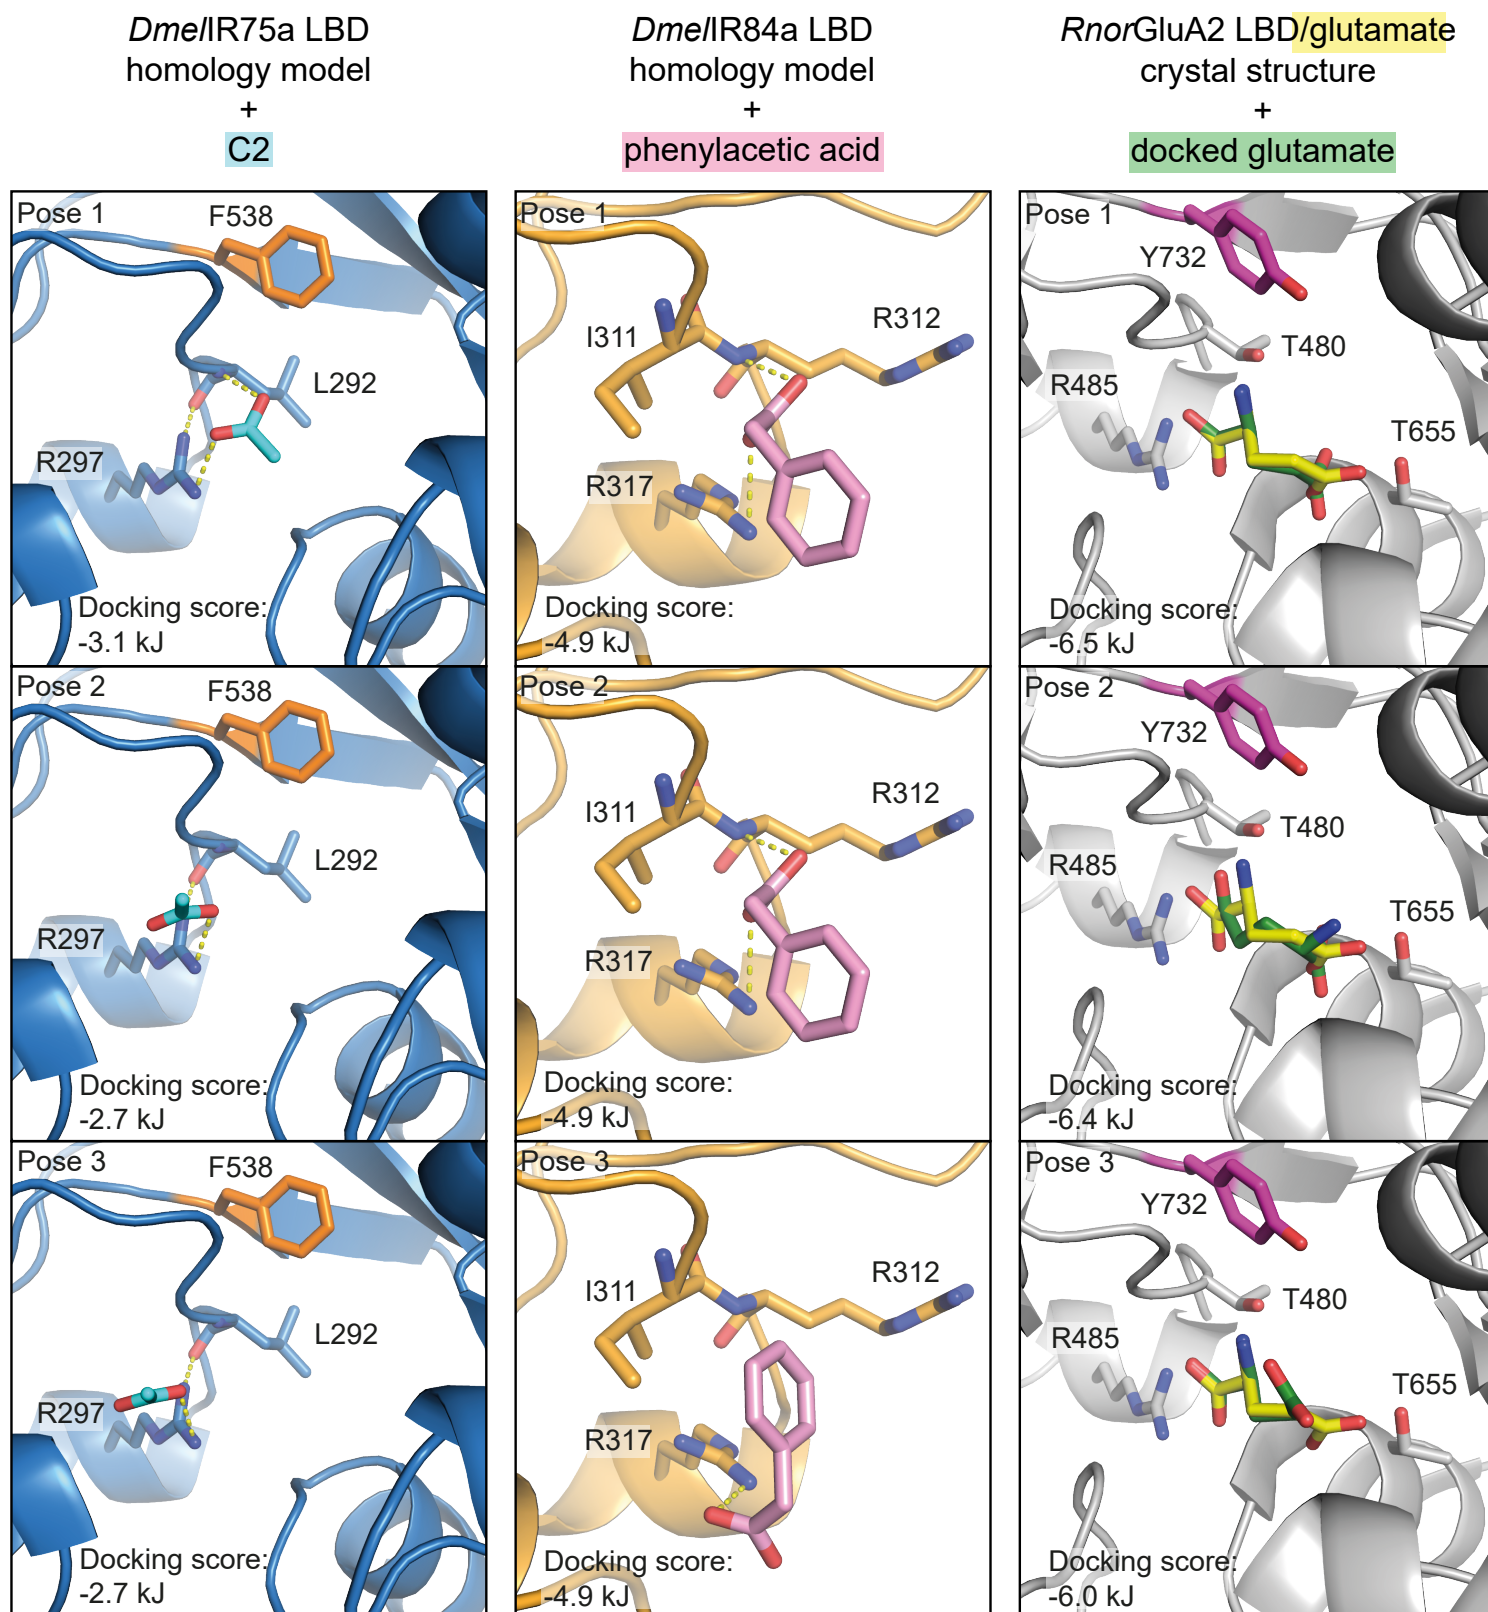

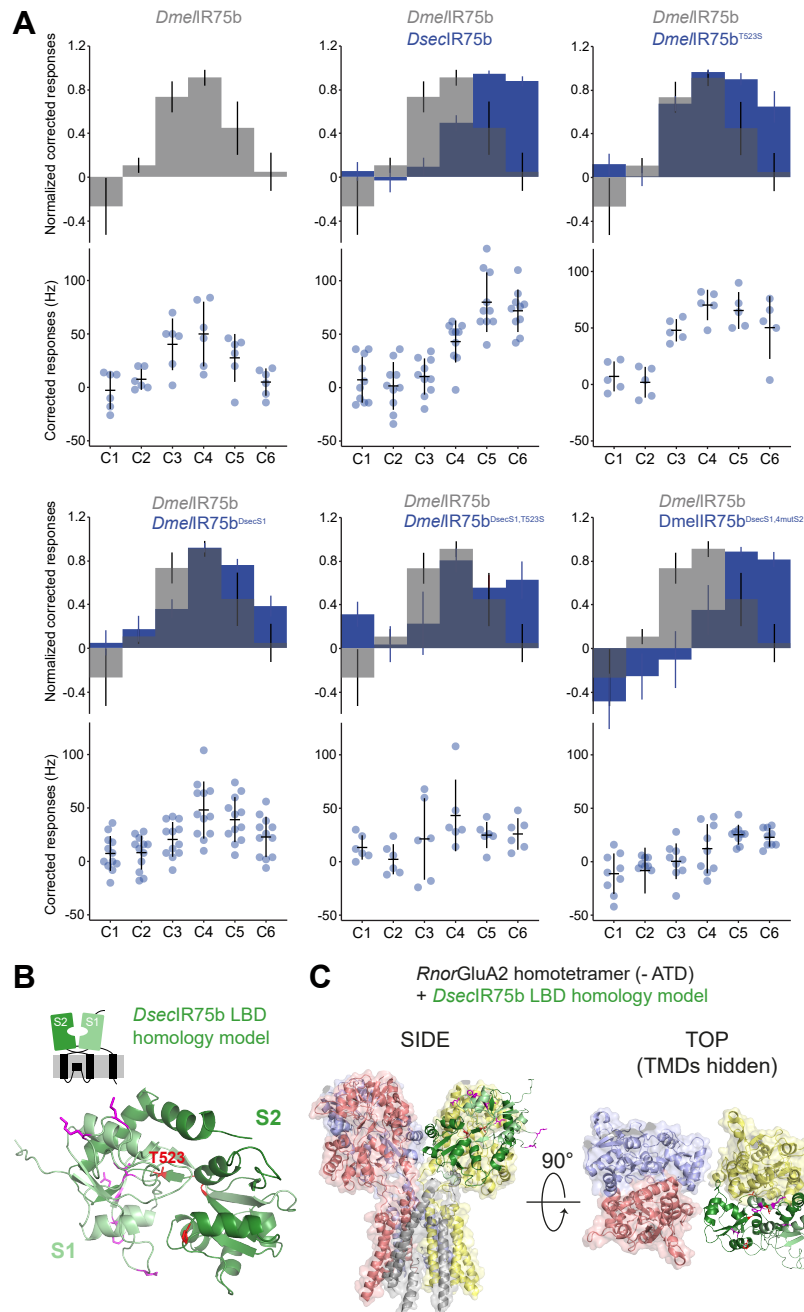

Source: https://www.biorxiv.org/content/10.1101/2021.04.23.440888v2.full.pdf
